Articles of interest in other COB journals

From *Journal of Cell Science*

**The facultative heterochromatin of the inactive X chromosome has a distinctive condensed ultrastructure**

Rego, A. et al. 2008. *J. Cell Sci.* doi: doi:10.1242/jcs.026104

**Analysis of protein domains and Rett syndrome mutations indicate that multiple regions influence chromatin-binding dynamics of the chromatin-associated protein MECP2 in vivo**

Kumar, A. et al. 2008. *J. Cell Sci.* doi: 10.1242/jcs.016865
